# Supplementary material for: Identification of Susceptibility Genes for Peritoneal, Ovarian, and Deep Infiltrating Endometriosis Using a Pooled Sample-Based Genome-Wide Association Study
Source: Hindawi journal article supplement (doi:10.1155/2015/461024), 2015-01-01
Supplement: f1 [file 461024.f1.pdf]

## Supplemental data

Supplemental table 1. Technical specifications of the primers used for individual genotyping

| SNP ID                                            | Size | PCR primer forward          | PCR primer reverse                  | Temp PCR (°C) | Pyrosequencing primer(s) |
|---------------------------------------------------|------|-----------------------------|-------------------------------------|---------------|--------------------------|
| <b>rs776108</b><br>chr3:77,825,927-77,826,729     | 127  | 5'-ACCAGGCTAGGCATGCTATA     | 5'- Biotin-GTCACTTAACAGCAGTGTGTCA   | 61            | ATACCTCTCATTTTGCAG       |
| <b>rs3746192</b><br>chr19:17,946,368-17,946,488   | 92   | 5'-ATTCTAGGTGGCATGAGGG      | 5'- Biotin-CTGGGGAGCAACAGAAGA       | 56            | AGGCTTGTAACCTGGA         |
| <b>rs988147</b><br>chr6:45282108-45282608         | 169  | 5'-AGCCATTAAGAATTTCAAA      | 5'- Biotine-TTGGATTTTATCTTGTAAATAGG | 53            | GCAGGGGGTAGAAATG         |
| <b>rs227849</b><br>chr6:44,806,436-44,806,936     | 94   | 5'-AGGAAAATAACATGTGGTTAAAG  | 5'- Biotine-TCTACCAATATTTCTTTCGTAGT | 56            | GGTTTAAGGTCTTTGCAT       |
| <b>rs10733833</b><br>chr10:68,418,227-68,418,727  | 127  | 5'-GCCAAAACCAACAGTTCAT      | 5'- Biotine-GAAAAAATTCACCTGTCTC     | 58            | CATGTTTAAAACCTTTCAG      |
| <b>rs322609</b><br>chr16:62,432,604-62,433,104    | 197  | 5'-TAGTTGATTTTGCCAACCTG     | 5'-Biotin-AAATGGGTGACAGAAGTAATAAGA  | 60            | GGTAGCTGTGGGTGGA         |
| <b>rs1884779</b><br>chr20:45,857,969-45,858,469   | 127  | 5'-TGGCTATTGGAGTTCTCA       | 5'-Biotin-CCATCCATCCCAAATAGT        | 55            | AGTGAATTAAGGGCTTGT       |
| <b>rs4703908</b><br>chr5:71,802,353-71,802,853    | 83   | 5'-GAAAATGCCCAAGGTGAC       | 5'-Biotin-GAATGTGGGTGTGTTTACTCT     | 52            | GTGACAGTGGGCAAA          |
| <b>rs6946871</b><br>chr7:4,037,310-4,037,810      | 290  | 5'-ATCAGATAAAATCGGCTTCTGTG  | 5'-Biotin-TCGGGAAGGTTTTGTACTTTTG    | 61            | GGAGGAAAAGGAAAAGTT       |
| <b>rs11865033</b><br>chr16:78,082,945-78,083,445  | 123  | 5'-AATAAACCAAGCCCTGAAAAGTC  | 5'-Biotin-ACTAAAAATCCCCCTTCTCCA     | 61            | AAAGTCTCTTCTATGAGC       |
| <b>rs247004</b><br>chr5:131,372,007-131,372,507   | 170  | 5'-GGGGAATTTGTCAGAGATAGGG   | 5'-Biotin-GGGATCCTCTACCATCCAAATAA   | 62            | GGAAGCCAGACTAGCAG        |
| <b>rs11647011</b><br>chr16:11,115,341-11,115,841  | 113  | 5'-TGTGTGTTTATTGGCAATCCC    | 5'-Biotin-CCCTATGATTTAAGAGGCCAAA    | 61            | CCCCTTCCCCTCATC          |
| <b>rs7477459</b><br>chr10:60,671,071-60,671,571   | 213  | 5'-GGGTTTCAGGAATTCACTGAGATT | 5'-Biotin-TCGCCCTTGTTACATTCTCATA    | 63            | TCACTGAGATTGGTAGACA      |
| <b>rs5913038</b><br>chrX:78,852,083-78,852,583    | 107  | 5'-CATGTTACGGGCTTCAGATTG    | 5'-Biotin-ATTGAGAATGCACCTGGTCAC     | 64            | TATAAACAAATATTAATTTCC    |
| <b>rs17056959</b><br>chr6:97,280,380-97,280,880   | 181  | 5'-CRGAACTCCAGATGTCAAAA     | 5'-Biotin-TGAGTGTTTGATCCCTGGATTT    | 61            | TTAAATAAAAATAATTCATG     |
| <b>rs16986515</b><br>chrX:11,632,168-11,632,668   | 125  | 5'-AGGGGAAGAAGGTTGGA        | 5'-Biotin-GAGACCATTGGGCAGGTGTA      | 56            | CTGAGGCCAAAGTCC          |
| <b>rs11865033</b><br>chr16:78,082,945-78,083,445  | 120  | 5'-CCAAATCTAATAAACCAAGC     | 5'- Biotine-CCCCTTCTCCATT           | 51            | AAAGTCTCTTCTATGAGC       |
| <b>rs16913217</b><br>chr11:88,789,821-88,790,321  | 118  | 5'-TTTCTTCGAAAGGAGCT        | 5'- biotine-TCAGAAGGAGATGCATACT     | 53            | TTCGAAAGGAGCTGG          |
| <b>rs966674</b><br>chr5:98,487,305-98,487,805     | 108  | 5'-GAGAGGCTAAAATTATTG       | 5'- biotine-CTAACCATTTTAAAGGTATC    | 51            | TTTATTTATTGAAAACACAGG    |
| <b>rs7333155</b><br>chr13:26,663,684-26,664,184   | 209  | 5'-TAATTTAGAATACTGGTTCAA    | 5'- Biotine-GAAAGCATGGTGAACATC      | 51            | TCTGAGTCATGTTTTCATC      |
| <b>rs2479037</b><br>chr10:114,586,465-114,586,965 | 114  | 5'-TTCTCCTGCACTATTGG        | 5'- biotine-TGCAGTGGCTTCAAGT        | 52            | CTATTGGCTCACAGTCC        |

Supplemental table 2. Baseline characteristics of participants. Data are presented as mean  $\pm$  SD (range) or n (%); NS: not significant; NA: not applicable; <sup>a</sup> Visual analogue scale; <sup>b</sup> Sometimes more than one for the same patient; <sup>c</sup> stage and score according to the revised American Fertility Society (rAFS) classification. P-values are computed with Student's t-test or Pearson's  $\chi^2$ -test.

|                                                           | <b>Endometriosis<br/>N = 319</b> | <b>Controls<br/>N = 308</b> | <b>P-value</b> |
|-----------------------------------------------------------|----------------------------------|-----------------------------|----------------|
| <b>Age (years)</b>                                        | 31.6 $\pm$ 4.9                   | 31.0 $\pm$ 5.9              | NS             |
| <b>Height (cm)</b>                                        | 165.3 $\pm$ 6.8                  | 165.8 $\pm$ 6.1             | NS             |
| <b>Weight (kg)</b>                                        | 59.9 $\pm$ 10.2                  | 61.9 $\pm$ 11.9             | NS             |
| <b>BMI (kg/m<sup>2</sup>)</b>                             | 21.9 $\pm$ 3.6                   | 22.5 $\pm$ 4.0              | NS             |
| <b>Parity</b>                                             | 0.2 $\pm$ 0.5                    | 0.3 $\pm$ 0.8               | NS             |
| <b>Gravidity</b>                                          | 0.5 $\pm$ 0.9                    | 0.7 $\pm$ 1.3               | NS             |
| <b>Infertility</b>                                        | 125 (39.2)                       | 105 (34.1)                  | NS             |
| <b>Preoperative painful symptoms scores<sup>a,b</sup></b> |                                  |                             |                |
| Dysmenorrhea                                              | 6.7 $\pm$ 2.8                    | 3.8 $\pm$ 3.2               | <0.001         |
| Deep dyspareunia                                          | 4.2 $\pm$ 3.4                    | 1.5 $\pm$ 2.6               | <0.001         |
| Non cyclic chronic pelvic pain                            | 3.0 $\pm$ 3.2                    | 1.7 $\pm$ 2.7               | <0.001         |
| Gastro-intestinal symptoms                                | 3.5 $\pm$ 3.6                    | 0.7 $\pm$ 2.0               | <0.001         |
| Lower urinary tract symptoms                              | 1.0 $\pm$ 2.3                    | 0.1 $\pm$ 0.8               | <0.001         |
| <b>rAFS stage<sup>c</sup></b>                             |                                  | NA                          |                |
| I                                                         | 75 (23.5)                        |                             |                |
| II                                                        | 70 (21.9)                        |                             |                |
| III                                                       | 76 (23.8)                        |                             |                |
| IV                                                        | 98 (30.8)                        |                             |                |
| <b>rAFS scores<sup>c</sup></b>                            |                                  | NA                          |                |
| Adhesions                                                 | 13.6 $\pm$ 12.3                  |                             |                |
| Implants                                                  | 17.5 $\pm$ 23.1                  |                             |                |
| Total                                                     | 31.1 $\pm$ 30.7                  |                             |                |
| <b>Surgical classification</b>                            |                                  | NA                          |                |
| SUP                                                       | 62 (19.4)                        |                             |                |
| OMA                                                       | 141 (44.2)                       |                             |                |
| DIE                                                       | 116 (36.4)                       |                             |                |
| DIE + OMA                                                 | 52 (16.3)                        |                             |                |
| <b>OMA size (cm)</b>                                      |                                  | NA                          |                |
| Right                                                     | 3.7 $\pm$ 2.3                    |                             |                |
| Left                                                      | 4.4 $\pm$ 3.0                    |                             |                |
| <b>OMA laterality</b>                                     |                                  | NA                          |                |
| Bilateral                                                 | 33/141 (23.3)                    |                             |                |
| Right                                                     | 46/141 (32.7)                    |                             |                |
| Left                                                      | 62/141 (44.0)                    |                             |                |
| <b>Mean number of DIE lesions</b>                         | 2.9 $\pm$ 2.0                    | NA                          |                |
| <b>Total number of DIE lesions</b>                        |                                  | NA                          |                |
| 1                                                         | 40/116 (34.2%)                   |                             |                |
| 2                                                         | 26/116 (22.8%)                   |                             |                |
| $\geq 3$                                                  | 50/116 (43.0%)                   |                             |                |
| <b>Anatomical distribution of DIE</b>                     |                                  | NA                          |                |
| Uterosacral ligament                                      | 82/116 (70.7%)                   |                             |                |
| Vagina                                                    | 41/116 (35.3%)                   |                             |                |
| Bladder                                                   | 16/116 (13.8%)                   |                             |                |
| Intestine                                                 | 57/116 (49.2%)                   |                             |                |
| Ureter                                                    | 0/116 (0.0%)                     |                             |                |
| <b>Worst DIE lesion</b>                                   |                                  | NA                          |                |
| Uterosacral ligament                                      | 24/116 (20.7%)                   |                             |                |
| Vagina                                                    | 23/116 (19.8%)                   |                             |                |
| Bladder                                                   | 12/116 (10.3%)                   |                             |                |
| Intestine                                                 | 57/116 (49.2%)                   |                             |                |
| Ureter                                                    | 0/116 (0.0%)                     |                             |                |

Supplemental table 3. Baseline characteristics of the discovery cohort. Data are presented as mean  $\pm$  SD (range) or n (%); NS: not significant; NA: not applicable; <sup>a</sup> Visual analogue scale; <sup>b</sup> Sometimes more than one for the same patient; <sup>c</sup> stage and score according to the revised American Fertility Society (rAFS) classification. P-values are computed with Student's t-test or Pearson's  $\chi^2$ -test.

|                                                           | SUP (N=20)      | OMA (N=20)      | DIE (N=20)      | P-value |
|-----------------------------------------------------------|-----------------|-----------------|-----------------|---------|
| <b>Age (years)</b>                                        | 32.3 $\pm$ 5.9  | 31.4 $\pm$ 4.3  | 30.9 $\pm$ 5.3  | NS      |
| <b>Height (cm)</b>                                        | 164.9 $\pm$ 6.4 | 165.7 $\pm$ 5.9 | 165.1 $\pm$ 4.8 | NS      |
| <b>Weight (kg)</b>                                        | 58.9 $\pm$ 9.8  | 59.1 $\pm$ 10.9 | 58.3 $\pm$ 7.2  | NS      |
| <b>BMI (kg/m<sup>2</sup>)</b>                             | 22.1 $\pm$ 2.6  | 22.5 $\pm$ 3.1  | 21.7 $\pm$ 2.2  | NS      |
| <b>Parity</b>                                             | 0.3 $\pm$ 0.5   | 0.3 $\pm$ 0.8   | 0.3 $\pm$ 0.7   | NS      |
| <b>Gravidity</b>                                          | 0.6 $\pm$ 1.0   | 0.7 $\pm$ 1.2   | 0.6 $\pm$ 1.2   | NS      |
| <b>Infertility</b>                                        | 7 (35.0)        | 8 (40.0)        | 7 (35.0)        | NS      |
| <b>Preoperative painful symptoms scores<sup>a,b</sup></b> |                 |                 |                 | <0.01   |
| Dysmenorrhea                                              | 6.7 $\pm$ 2.8   | 5.2 $\pm$ 1.3   | 7.5 $\pm$ 2.9   |         |
| Deep dyspareunia                                          | 4.2 $\pm$ 3.4   | 3.1 $\pm$ 1.0   | 6.1 $\pm$ 3.4   |         |
| Non cyclic chronic pelvic pain                            | 3.0 $\pm$ 3.2   | 2.9 $\pm$ 0.3   | 4.0 $\pm$ 2.2   |         |
| Gastro-intestinal symptoms                                | 3.5 $\pm$ 3.6   | 2.2 $\pm$ 1.3   | 6.9 $\pm$ 3.2   |         |
| Lower urinary tract symptoms                              | 1.0 $\pm$ 2.3   | 0.2 $\pm$ 1.2   | 3.1 $\pm$ 2.2   |         |
| <b>rAFS stage<sup>c</sup></b>                             |                 |                 |                 | < 0.001 |
| I                                                         | 9 (45.0)        | 0 (0.0)         | 0 (0.0)         |         |
| II                                                        | 11 (55.0)       | 0 (0.0)         | 0 (0.0)         |         |
| III                                                       | 0 (0.0)         | 14 (70.0)       | 8 (40.0)        |         |
| IV                                                        | 0 (0.0)         | 6 (30.0)        | 12 (60.0)       |         |
| <b>OMA size (cm)</b>                                      | NA              |                 |                 | NS      |
| Right                                                     |                 | 4.5 $\pm$ 2.2   | 3.9 $\pm$ 2.0   |         |
| Left                                                      |                 | 4.6 $\pm$ 3.0   | 4.5 $\pm$ 3.9   |         |
| <b>OMA laterality</b>                                     | NA              |                 |                 | < 0.01  |
| Bilateral                                                 |                 | 0/20 (0.0)      | 20/20 (100.0)   |         |
| Right                                                     |                 | 10/20 (50.0)    | 0/20 (100.0)    |         |
| Left                                                      |                 | 10/20 (50.0)    | 0/20 (100.0)    |         |
| <b>Mean number of DIE lesions</b>                         | NA              | NA              | 3.6 $\pm$ 1.2   | NA      |
| <b>Anatomical distribution of DIE</b>                     | NA              | NA              |                 | NA      |
| Uterosacral ligament                                      |                 |                 | 18/20 (90.0%)   |         |
| Vagina                                                    |                 |                 | 15/20 (75.0%)   |         |
| Bladder                                                   |                 |                 | 0/20 (0.0%)     |         |
| Intestine                                                 |                 |                 | 20/20 (100.0%)  |         |
| Ureter                                                    |                 |                 | 0/116 (0.0%)    |         |
| <b>Worst DIE lesion</b>                                   | NA              | NA              |                 | NA      |
| Uterosacral ligament                                      |                 |                 | 0/20 (0.0%)     |         |
| Vagina                                                    |                 |                 | 0/20 (0.0%)     |         |
| Bladder                                                   |                 |                 | 0/20 (0.0%)     |         |
| Intestine                                                 |                 |                 | 20/20 (100%)    |         |
| Ureter                                                    |                 |                 | 0/20 (0.0%)     |         |



|                   |          |                |              |              |                |              |              |                |              |              |                                                |
|-------------------|----------|----------------|--------------|--------------|----------------|--------------|--------------|----------------|--------------|--------------|------------------------------------------------|
| rs17832300        | 4        |                |              |              | 67,467         | 0,080        | 0,029        |                |              |              | C4orf14 (0.92) IGFBP7 (1.32) POLR2B (0.82)     |
| rs11733111        | 4        |                |              |              | 77,208         | 0,107        | 0,044        |                |              |              | CLCN3 (0.47)                                   |
| rs1480713         | 4        |                |              |              | 83,776         | 0,084        | 0,025        |                |              |              | BMP2K (0.73) PAQR3 (0.35)                      |
| rs2537869         | 4        |                |              |              | 101,788        | 0,141        | 0,031        |                |              |              | KIT (5.35)                                     |
| <b>rs247004</b>   | <b>5</b> |                |              |              | <b>131,934</b> | <b>0,142</b> | <b>0,017</b> | <b>156,523</b> | <b>0,148</b> | <b>0,012</b> | <b>ACSL6 (1.18)</b>                            |
| <b>rs4703908</b>  | <b>5</b> |                |              |              | <b>116,523</b> | <b>0,153</b> | <b>0,029</b> | <b>107,713</b> | <b>0,184</b> | <b>0,047</b> | <b>ZNF366 (1.29)</b>                           |
| <b>rs17080695</b> | <b>5</b> | <b>73,986</b>  | <b>0,124</b> | <b>0,049</b> | <b>45,071</b>  | <b>0,050</b> | <b>0,021</b> |                |              |              | <b>MGAT1 (1.08)</b>                            |
| rs10042444        | 5        |                |              |              |                |              |              | 0,008          | 0,162        | 0,024        | SH3RF2                                         |
| rs323763          | 5        |                |              |              |                |              |              | 0,024          | 0,019        | 0,004        | MGC33214                                       |
| rs966674          | 5        |                |              |              |                |              |              | 0,048          | 0,008        | 0,006        | inter                                          |
| rs10940176        | 5        |                |              |              |                |              |              | 202,000        | 0,401        | 0,048        | PIK3R1                                         |
| rs251529          | 5        |                |              |              |                |              |              | 204,727        | 0,201        | 0,023        | MOCS2, FST                                     |
| rs7733760         | 5        |                |              |              |                |              |              | 110,367        | 0,167        | 0,044        | inter                                          |
| rs1423113         | 5        | 172,857        | 0,308        | 0,039        |                |              |              |                |              |              | ZFYVE16                                        |
| rs10512928        | 5        | 58,552         | 0,041        | 0,010        |                |              |              |                |              |              | ADCY2                                          |
| rs1689953         | 5        | 40,179         | 0,048        | 0,038        |                |              |              |                |              |              | MGC23909                                       |
| rs17147703        | 5        | 0,007          | 0,225        | 0,027        |                |              |              |                |              |              | FTMT                                           |
| rs1345683         | 5        |                |              |              | 0,006          | 0,090        | 0,001        |                |              |              | FLJ43080 (0.24)                                |
| rs2619861         | 5        |                |              |              | 0,024          | 0,017        | 0,001        |                |              |              | C5orf23 (1.21)                                 |
| rs6862278         | 5        |                |              |              | 100,754        | 0,112        | 0,019        |                |              |              | DOCK2 (1.96)                                   |
| rs10053139        | 5        |                |              |              | 102,299        | 0,093        | 0,018        |                |              |              | CDH12 (0.37)                                   |
| <b>rs17056959</b> | <b>6</b> |                |              |              | <b>0,015</b>   | <b>0,106</b> | <b>0,044</b> | <b>0,014</b>   | <b>0,078</b> | <b>0,024</b> | <b>GPR63 (2.69)</b>                            |
| <b>rs988147</b>   | <b>6</b> | <b>413,289</b> | <b>0,314</b> | <b>0,005</b> |                |              |              | <b>319,292</b> | <b>0,341</b> | <b>0,020</b> | <b>SUPT3H</b>                                  |
| <b>rs227849</b>   | <b>6</b> | <b>321,093</b> | <b>0,325</b> | <b>0,016</b> | <b>333,485</b> | <b>0,289</b> | <b>0,016</b> |                |              |              | <b>RUNX2 (0.92) SUPT3H (1.20) CDC5L (1.31)</b> |
| rs4959712         | 6        |                |              |              |                |              |              | 0,009          | 0,048        | 0,006        | MYLK4                                          |
| rs2571587         | 6        |                |              |              |                |              |              | 0,010          | 0,130        | 0,027        | LAMA2                                          |
| rs9322830         | 6        |                |              |              |                |              |              | 0,019          | 0,014        | 0,001        | LIN28B                                         |
| rs6940248         | 6        |                |              |              |                |              |              | 0,023          | 0,047        | 0,028        | MAN1A1                                         |
| rs1615962         | 6        |                |              |              |                |              |              | 283,962        | 0,240        | 0,014        | inter                                          |
| rs16894463        | 6        |                |              |              |                |              |              | 296,866        | 0,225        | 0,011        | NCR2                                           |
| rs9296749         | 6        |                |              |              |                |              |              | 33,257         | 0,043        | 0,033        | C6orf142 TINAG                                 |
| rs12111005        | 6        |                |              |              |                |              |              | 33,139         | 0,048        | 0,032        | PRL, HDGFL1                                    |
| rs4708515         | 6        | 111,556        | 0,123        | 0,020        |                |              |              |                |              |              | THBS2, SMOC2                                   |
| rs12524898        | 6        | 264,808        | 0,424        | 0,030        |                |              |              |                |              |              | inter                                          |
| rs9497102         | 6        | 53,066         | 0,053        | 0,016        |                |              |              |                |              |              | UTRN                                           |
| rs3789771         | 6        |                |              |              | 0,021          | 0,030        | 0,005        |                |              |              | EFHC1 (0.31) TRAM2 (1.40)                      |
| rs6570813         | 6        |                |              |              | 90,675         | 0,112        | 0,031        |                |              |              | SASH1 (0.74)                                   |
| rs9401519         | 6        |                |              |              | 113,431        | 0,144        | 0,014        |                |              |              | HSF2 (1.03)                                    |
| rs9321325         | 6        |                |              |              | 115,893        | 0,192        | 0,049        |                |              |              | FBXL4 (0.79)                                   |
| rs10947850        | 6        |                |              |              | 126,780        | 0,228        | 0,047        |                |              |              | EDN1 (1.86) HIVEP1 (1.03)                      |
| <b>rs6946871</b>  | <b>7</b> |                |              |              | <b>172,041</b> | <b>0,165</b> | <b>0,014</b> | <b>173,995</b> | <b>0,354</b> | <b>0,046</b> | <b>SDK1 (0.22)</b>                             |
| <b>rs17138951</b> | <b>7</b> | <b>0,004</b>   | <b>0,422</b> | <b>0,030</b> | <b>0,005</b>   | <b>0,416</b> | <b>0,038</b> |                |              |              | <b>ZNF680 (1.03)</b>                           |
| rs4478510         | 7        |                |              |              |                |              |              | 0,011          | 0,141        | 0,030        | C7orf53, TMEM168                               |
| rs6977949         | 7        |                |              |              |                |              |              | 112,668        | 0,104        | 0,013        | KCND2                                          |
| rs17148913        | 7        |                |              |              |                |              |              | 24,001         | 0,040        | 0,038        | inter                                          |
| rs17683020        | 7        | 119,486        | 0,082        | 0,008        |                |              |              |                |              |              | ETV1                                           |
| rs7804006         | 7        | 151,751        | 0,205        | 0,015        |                |              |              |                |              |              | inter                                          |
| rs10486019        | 7        | 105,605        | 0,193        | 0,049        |                |              |              |                |              |              | PBEF1                                          |
| rs10950610        | 7        | 59,414         | 0,073        | 0,022        |                |              |              |                |              |              | SOSTDC1                                        |
| rs4141805         | 7        | 66,584         | 0,096        | 0,029        |                |              |              |                |              |              | inter                                          |
| rs2012007         | 7        |                |              |              | 43,669         | 0,043        | 0,014        |                |              |              | inter                                          |
| <b>rs6558435</b>  | <b>8</b> | <b>236,327</b> | <b>0,468</b> | <b>0,041</b> | <b>181,398</b> | <b>0,150</b> | <b>0,011</b> |                |              |              | <b>ERICH1 (0.93) DLGAP2 (0.89)</b>             |
| rs3134388         | 8        |                |              |              |                |              |              | 0,011          | 0,024        | 0,002        | EXT1, THRAP6                                   |
| rs1821134         | 8        |                |              |              |                |              |              | 147,730        | 0,188        | 0,023        | PGCP, TSPYL5                                   |
| rs1429948         | 8        |                |              |              |                |              |              | 105,479        | 0,079        | 0,006        | ZMAT4                                          |
| rs10107657        | 8        |                |              |              |                |              |              | 99,098         | 0,062        | 0,006        | XKR4, TMEM68, NCOA6IP                          |
| rs2202989         | 8        | 0,005          | 0,299        | 0,028        |                |              |              |                |              |              | SGCZ                                           |
| rs7017160         | 8        |                |              |              | 0,008          | 0,132        | 0,017        |                |              |              | FKSG2 (0.82)                                   |
| rs710261          | 8        |                |              |              | 43,419         | 0,008        | 0,002        |                |              |              | inter                                          |
| rs2670882         | 8        |                |              |              | 100,903        | 0,004        | 0,000        |                |              |              | DDEF1 (1.98)                                   |
| rs2458064         | 8        |                |              |              | 109,850        | 0,138        | 0,021        |                |              |              | CSMD3 (1.16)                                   |
| rs10972238        | 9        |                |              |              |                |              |              | 0,005          | 0,052        | 0,000        | inter                                          |
| rs7045055         | 9        |                |              |              |                |              |              | 0,012          | 0,114        | 0,017        | MPDZ                                           |
| rs1332252         | 9        |                |              |              |                |              |              | 0,033          | 0,059        | 0,047        | CDK5RAP2                                       |
| rs17770971        | 9        | 124,472        | 0,104        | 0,011        |                |              |              |                |              |              | LINGO2                                         |

|                   |           |                |              |              |                |              |              |                |              |              |                                       |
|-------------------|-----------|----------------|--------------|--------------|----------------|--------------|--------------|----------------|--------------|--------------|---------------------------------------|
| rs874056          | 9         | 211,331        | 0,210        | 0,009        |                |              |              |                |              |              | RAPGEF1                               |
| rs10967100        | 9         | 86,215         | 0,086        | 0,011        |                |              |              |                |              |              | inter                                 |
| rs4449884         | 9         | 0,010          | 0,105        | 0,020        |                |              |              |                |              |              | inter                                 |
| rs13439981        | 9         | 0,035          | 0,029        | 0,013        |                |              |              |                |              |              | PGM5                                  |
| rs10962181        | 9         |                |              |              | 0,018          | 0,053        | 0,013        |                |              |              | inter                                 |
| rs167565          | 9         |                |              |              | 92,006         | 0,118        | 0,025        |                |              |              | C9orf84 (1.62)                        |
| rs10987199        | 9         |                |              |              | 147,109        | 0,144        | 0,010        |                |              |              | FAM125B (1.92) PBX3 (5.44)            |
| <b>rs10733833</b> | <b>10</b> | <b>136,688</b> | <b>0,205</b> | <b>0,033</b> |                |              |              | <b>176,217</b> | <b>0,269</b> | <b>0,027</b> | <b>CTNNA3, LRRTM3</b>                 |
| rs11008755        | 10        |                |              |              |                |              |              | 0,010          | 0,169        | 0,044        | inter                                 |
| rs4880401         | 10        |                |              |              |                |              |              | 0,014          | 0,049        | 0,008        | C10orf91                              |
| rs12412248        | 10        |                |              |              |                |              |              | 0,016          | 0,052        | 0,009        | MPP7                                  |
| rs7477459         | 10        |                |              |              |                |              |              | 144,326        | 0,158        | 0,017        | PHYHIPL                               |
| rs11814418        | 10        |                |              |              |                |              |              | 101,860        | 0,107        | 0,018        | SHOC2                                 |
| rs7904054         | 10        |                |              |              |                |              |              | 36,407         | 0,037        | 0,018        | ADD3                                  |
| rs17111156        | 10        | 60,928         | 0,102        | 0,042        |                |              |              |                |              |              | ENTPD1                                |
| rs16917404        | 10        | 0,015          | 0,092        | 0,027        |                |              |              |                |              |              | CACNB2                                |
| rs7075914         | 10        | 0,027          | 0,067        | 0,045        |                |              |              |                |              |              | OLAH                                  |
| rs12266178        | 10        |                |              |              | 31,430         | 0,006        | 0,000        |                |              |              | CHAT (1.44)                           |
| rs11192335        | 10        |                |              |              | 36,732         | 0,037        | 0,011        |                |              |              | SORCS3 (0.97)                         |
| rs2479037         | 10        |                |              |              | 47,379         | 0,019        | 0,002        |                |              |              | VTI1A (0.94)                          |
| rs11191445        | 10        |                |              |              | 153,942        | 0,046        | 0,001        |                |              |              | ASMT (1.68)                           |
| rs11238595        | 10        |                |              |              | 167,382        | 0,117        | 0,003        |                |              |              | ZNF239 (0.74) ZNF485 (0.57)           |
| rs7087197         | 10        |                |              |              | 216,950        | 0,159        | 0,009        |                |              |              | CNNM1 (1.41) GOT1 (1.02) HPSE2 (0.04) |
| <b>rs6589535</b>  | <b>11</b> | <b>132,232</b> | <b>0,277</b> | <b>0,042</b> | <b>78,770</b>  | <b>0,133</b> | <b>0,035</b> |                |              |              | <b>inter</b>                          |
| <b>rs10430848</b> | <b>11</b> | <b>254,632</b> | <b>0,439</b> | <b>0,028</b> | <b>148,169</b> | <b>0,187</b> | <b>0,026</b> |                |              |              | <b>TMEM16C (0.69)</b>                 |
| rs17129612        | 11        |                |              |              |                |              |              | 67,405         | 0,099        | 0,039        | inter                                 |
| rs16935076        | 11        |                |              |              |                |              |              | 60,038         | 0,087        | 0,026        | MRGPRX3                               |
| rs1945063         | 11        |                |              |              |                |              |              | 58,751         | 0,026        | 0,001        | GUCY1A2, AASDHPPT                     |
| rs16913217        | 11        |                |              |              |                |              |              | 43,479         | 0,028        | 0,004        | NOX4                                  |
| rs10840096        | 11        | 131,929        | 0,153        | 0,020        |                |              |              |                |              |              | inter                                 |
| rs10400310        | 11        | 108,532        | 0,135        | 0,017        |                |              |              |                |              |              | inter                                 |
| rs185932          | 11        | 43,213         | 0,069        | 0,042        |                |              |              |                |              |              | inter                                 |
| rs4287329         | 11        | 0,007          | 0,251        | 0,034        |                |              |              |                |              |              | API5                                  |
| rs7950582         | 11        |                |              |              | 38,557         | 0,055        | 0,023        |                |              |              | ETS1 (1.75)                           |
| rs16930631        | 11        |                |              |              | 51,099         | 0,093        | 0,039        |                |              |              | C11orf74 (1.55) RAG2 (1.13)           |
| rs1998277         | 11        |                |              |              | 210,115        | 0,386        | 0,042        |                |              |              | ABTB2 (0.40)                          |
| <b>rs2252178</b>  | <b>12</b> | <b>194,081</b> | <b>0,413</b> | <b>0,035</b> | <b>168,457</b> | <b>0,333</b> | <b>0,044</b> |                |              |              | <b>inter</b>                          |
| rs10746146        | 12        |                |              |              |                |              |              | 0,005          | 0,240        | 0,012        | PPP1R12A                              |
| rs11168355        | 12        |                |              |              |                |              |              | 0,013          | 0,129        | 0,029        | PFKM, SENP1, COL2A1                   |
| rs7977296         | 12        |                |              |              |                |              |              | 0,014          | 0,086        | 0,012        | TMEM132B                              |
| rs7135451         | 12        |                |              |              |                |              |              | 0,014          | 0,093        | 0,014        | KLRD1, GABARAPL1                      |
| rs10507066        | 12        |                |              |              |                |              |              | 0,025          | 0,017        | 0,001        | CCDC38                                |
| rs7308297         | 12        | 124,089        | 0,196        | 0,022        |                |              |              |                |              |              | SYT1                                  |
| rs3858650         | 12        | 145,658        | 0,178        | 0,020        |                |              |              |                |              |              | inter                                 |
| rs10778921        | 12        | 197,554        | 0,322        | 0,023        |                |              |              |                |              |              | TMTC2                                 |
| rs1565351         | 12        | 253,219        | 0,502        | 0,038        |                |              |              |                |              |              | BTG1, DCN                             |
| rs12310279        | 12        | 90,151         | 0,117        | 0,022        |                |              |              |                |              |              | inter                                 |
| rs520242          | 12        | 45,897         | 0,029        | 0,007        |                |              |              |                |              |              | PIK3C2G                               |
| rs994713          | 12        | 0,023          | 0,068        | 0,027        |                |              |              |                |              |              | PKP2                                  |
| rs11060323        | 12        |                |              |              | 0,021          | 0,084        | 0,037        |                |              |              | TMEM132D (0.58)                       |
| rs17031072        | 12        |                |              |              | 38,120         | 0,050        | 0,013        |                |              |              | SLC5A8 (0.77)<br>TMEM16D (0.16)       |
| rs10879757        | 12        |                |              |              | 47,581         | 0,074        | 0,034        |                |              |              | inter                                 |
| rs4761981         | 12        |                |              |              | 75,591         | 0,112        | 0,024        |                |              |              | LOC57228 (1.28) BIN2 (1.27)           |
| rs10743769        | 12        |                |              |              | 85,294         | 0,086        | 0,016        |                |              |              | C12orf35 (0.80)                       |
| rs10506452        | 12        |                |              |              | 175,691        | 0,236        | 0,020        |                |              |              | inter                                 |
| rs9529872         | 13        |                |              |              |                |              |              | 0,102          | 0,020        | 0,045        | DACH1                                 |
| rs9580642         | 13        |                |              |              |                |              |              | 195,150        | 0,283        | 0,017        | SACS, TNFRSF19                        |
| rs1929744         | 13        | 91,116         | 0,154        | 0,032        |                |              |              |                |              |              | KCTD12                                |
| rs9552517         | 13        | 41,056         | 0,021        | 0,004        |                |              |              |                |              |              | inter                                 |
| rs1998833         | 13        | 0,041          | 0,043        | 0,041        |                |              |              |                |              |              | ATP12A                                |
| rs17463402        | 13        |                |              |              | 0,005          | 0,306        | 0,017        |                |              |              | inter                                 |
| rs9548405         | 13        |                |              |              | 79,804         | 0,143        | 0,033        |                |              |              | UFM1 (0.93) FREM2 (0.16)              |
| rs7982903         | 13        |                |              |              | 97,510         | 0,197        | 0,045        |                |              |              | KLF12 (1.36)                          |
| rs17083075        | 13        |                |              |              | 99,695         | 0,121        | 0,020        |                |              |              | ATP8A2 (0.86) TMEM46 (2.95)           |

|                   |           |                |              |              |                |              |              |               |              |              |                                                  |
|-------------------|-----------|----------------|--------------|--------------|----------------|--------------|--------------|---------------|--------------|--------------|--------------------------------------------------|
| rs9591697         | 13        |                |              |              | 106,307        | 0,035        | 0,000        |               |              |              | inter                                            |
| SNP_A-4201974     | 13        |                |              |              | 113,749        | 0,038        | 0,002        |               |              |              | inter                                            |
| rs17056562        | 13        |                |              |              | 152,511        | 0,088        | 0,003        |               |              |              | inter                                            |
| rs7333155         | 13        |                |              |              | 191,214        | 0,051        | 0,001        |               |              |              | RPL21 (1.58) USP12 (0.57)                        |
| <b>rs1548094</b>  | <b>14</b> | <b>0,009</b>   | <b>0,187</b> | <b>0,023</b> | <b>0,010</b>   | <b>0,182</b> | <b>0,024</b> |               |              |              | <b>inter</b>                                     |
| rs1950429         | 14        |                |              |              |                |              |              | 0,027         | 0,063        | 0,029        | inter                                            |
| rs1958682         | 14        |                |              |              |                |              |              | 0,029         | 0,055        | 0,022        | STXBP6                                           |
| rs944440          | 14        |                |              |              |                |              |              | 0,029         | 0,078        | 0,046        | FAM12A, RNASE4, ANG                              |
| rs1548094         | 14        | 0,009          | 0,187        | 0,023        |                |              |              |               |              |              | inter                                            |
| rs17557187        | 14        |                |              |              | 0,020          | 0,076        | 0,020        |               |              |              | inter                                            |
| rs1383795         | 14        |                |              |              | 0,031          | 0,023        | 0,006        |               |              |              | inter                                            |
| rs7145954         | 14        |                |              |              | 41,942         | 0,070        | 0,023        |               |              |              | TDP1 (0.42)                                      |
| rs5024915         | 14        |                |              |              | 150,421        | 0,227        | 0,015        |               |              |              | RNASE1 (3.50) RNASE6 (2.06)                      |
| rs712366          | 14        |                |              |              | 161,669        | 0,253        | 0,013        |               |              |              | SLC25A21 (0.90)                                  |
| rs16973230        | 15        |                |              |              |                |              |              | 0,006         | 0,093        | 0,000        | MEX3B                                            |
| rs17664311        | 15        |                |              |              |                |              |              | 0,035         | 0,025        | 0,009        | inter                                            |
| rs16963019        | 15        |                |              |              |                |              |              | 113,564       | 0,291        | 0,044        | ATP8B4                                           |
| rs2118181         | 15        | 154,118        | 0,419        | 0,038        |                |              |              |               |              |              | FBN1                                             |
| rs12161938        | 15        | 458,210        | 0,080        | 0,000        |                |              |              |               |              |              | C15orf2                                          |
| rs2959039         | 15        | 0,008          | 0,343        | 0,040        |                |              |              |               |              |              | MTMR15                                           |
| rs11071613        | 15        |                |              |              | 0,031          | 0,033        | 0,006        |               |              |              | RORA (0.56) VPS13C (0.34)                        |
| rs8039109         | 15        |                |              |              | 0,046          | 0,032        | 0,011        |               |              |              | inter                                            |
| rs16957964        | 15        |                |              |              | 24,958         | 0,035        | 0,015        |               |              |              | RYR3 (1.02)                                      |
| rs11074316        | 15        |                |              |              | 224,747        | 0,512        | 0,030        |               |              |              | GABRG3 (0.80)                                    |
| <b>rs11865033</b> | <b>16</b> |                |              |              | <b>0,043</b>   | <b>0,025</b> | <b>0,009</b> | <b>0,044</b>  | <b>0,012</b> | <b>0,000</b> | <b>MAF (1.79)</b>                                |
| <b>rs11647011</b> | <b>16</b> | <b>384,064</b> | <b>0,183</b> | <b>0,003</b> | <b>323,569</b> | <b>0,196</b> | <b>0,000</b> |               |              |              | <b>CLEC16A (0.78)</b>                            |
| <b>rs322609</b>   | <b>16</b> | <b>74,431</b>  | <b>0,004</b> | <b>0,000</b> | <b>110,368</b> | <b>0,343</b> | <b>0,042</b> |               |              |              | <b>CDH11 (1.70)</b>                              |
| <b>rs16949415</b> | <b>16</b> | <b>0,015</b>   | <b>0,099</b> | <b>0,019</b> | <b>0,020</b>   | <b>0,098</b> | <b>0,021</b> |               |              |              | <b>WVVOX (1.88)</b>                              |
| rs6500605         | 16        |                |              |              |                |              |              | 0,006         | 0,562        | 0,028        | DNAJA3                                           |
| rs2733954         | 16        |                |              |              |                |              |              | 0,007         | 0,184        | 0,012        | COX4I1                                           |
| rs7203742         | 16        |                |              |              |                |              |              | 0,011         | 0,068        | 0,005        | CTCF                                             |
| rs3910214         | 16        |                |              |              |                |              |              | 0,025         | 0,078        | 0,029        | CDH13                                            |
| rs16947741        | 16        |                |              |              |                |              |              | 75,844        | 0,150        | 0,021        | ZNF423                                           |
| rs16955369        | 16        | 41,020         | 0,088        | 0,032        |                |              |              |               |              |              | AYTL1                                            |
| rs16963958        | 16        | 43,201         | 0,081        | 0,035        |                |              |              |               |              |              | CDH8                                             |
| rs587388          | 16        | 0,008          | 0,391        | 0,041        |                |              |              |               |              |              | FAM86A, ALG1                                     |
| rs1362578         | 16        | 0,012          | 0,161        | 0,015        |                |              |              |               |              |              | CBLN1                                            |
| rs2982447         | 16        |                |              |              | 98,545         | 0,083        | 0,007        |               |              |              | inter                                            |
| rs7190066         | 16        |                |              |              | 181,207        | 0,516        | 0,036        |               |              |              | TMC7 (1.16)                                      |
| <b>rs2472694</b>  | <b>17</b> | <b>82,014</b>  | <b>0,159</b> | <b>0,030</b> | <b>81,709</b>  | <b>0,223</b> | <b>0,035</b> |               |              |              | <b>GRAP (1.35) PRPSAP2 (0.73) SLC5A10 (1.36)</b> |
| rs11080041        | 17        |                |              |              |                |              |              | 0,010         | 0,103        | 0,004        | CA10, KIF2B                                      |
| rs17836935        | 17        |                |              |              |                |              |              | 130,317       | 0,222        | 0,012        | RPL38, C17orf54                                  |
| rs16970536        | 17        |                |              |              |                |              |              | 69,030        | 0,086        | 0,011        | LIG3                                             |
| rs16970084        | 17        |                |              |              |                |              |              | 63,565        | 0,120        | 0,015        | TMEM132E                                         |
| rs4362431         | 17        |                |              |              | 0,011          | 0,130        | 0,008        |               |              |              | SP6 (1.65)                                       |
| rs886078          | 17        |                |              |              | 69,014         | 0,199        | 0,048        |               |              |              | CA10 (0.82)                                      |
| rs2957385         | 17        |                |              |              | 71,199         | 0,192        | 0,028        |               |              |              | CA10 (0.82) KIF2B (1.21)                         |
| rs17226067        | 17        |                |              |              | 76,980         | 0,133        | 0,014        |               |              |              | inter                                            |
| <b>rs10871642</b> | <b>18</b> |                |              |              | <b>54,143</b>  | <b>0,111</b> | <b>0,038</b> | <b>50,092</b> | <b>0,108</b> | <b>0,039</b> | <b>CCDC102B (1.83)</b>                           |
| rs900968          | 18        |                |              |              |                |              |              | 0,010         | 0,222        | 0,027        | SIGLEC15, SLC14A1                                |
| rs10782039        | 18        |                |              |              |                |              |              | 116,610       | 0,314        | 0,045        | RTTN                                             |
| rs16974452        | 18        |                |              |              |                |              |              | 102,010       | 0,231        | 0,042        | APCDD1                                           |
| rs572600          | 18        | 46,587         | 0,086        | 0,033        |                |              |              |               |              |              | YES1                                             |
| rs12455748        | 18        | 0,007          | 0,251        | 0,016        |                |              |              |               |              |              | DCC                                              |
| rs2156327         | 18        |                |              |              | 0,013          | 0,143        | 0,028        |               |              |              | CYB5A (0.73)                                     |
| rs16967025        | 18        |                |              |              | 0,029          | 0,053        | 0,021        |               |              |              | GALNT1 (0.61)                                    |
| rs16951910        | 18        |                |              |              | 47,892         | 0,074        | 0,021        |               |              |              | PTPRM (1.06)                                     |
| rs17797002        | 18        |                |              |              | 96,167         | 0,203        | 0,031        |               |              |              | NETO1 (1.28)                                     |
| rs12959798        | 18        |                |              |              | 291,798        | 0,582        | 0,023        |               |              |              | CETN1 (1.01) COLEC12 (3.0)                       |
| <b>rs3746192</b>  | <b>19</b> | <b>93,400</b>  | <b>0,173</b> | <b>0,006</b> | <b>78,952</b>  | <b>0,149</b> | <b>0,009</b> | <b>97,912</b> | <b>0,063</b> | <b>0,000</b> | <b>KCNN1 (1.02)</b>                              |
| rs6509349         | 19        |                |              |              |                |              |              | 143,835       | 0,535        | 0,032        | SULT2A1                                          |
| rs198963          | 19        | 77,112         | 0,057        | 0,000        |                |              |              |               |              |              | KLK2                                             |
| rs1105167         | 19        | 278,517        | 1,035        | 0,040        |                |              |              |               |              |              | inter                                            |
| rs17620912        | 19        |                |              |              | 0,011          | 0,219        | 0,016        |               |              |              | inter                                            |
| rs2965271         | 19        |                |              |              | 82,529         | 0,067        | 0,001        |               |              |              | SAE2 (0.90)                                      |
| <b>rs6049295</b>  | <b>20</b> | <b>137,490</b> | <b>0,198</b> | <b>0,007</b> |                |              |              | <b>90,072</b> | <b>0,146</b> | <b>0,015</b> | <b>inter</b>                                     |
| <b>rs1884779</b>  | <b>20</b> | <b>141,503</b> | <b>0,362</b> | <b>0,031</b> | <b>118,669</b> | <b>0,360</b> | <b>0,035</b> |               |              |              | <b>SULF2 (1.42)</b>                              |

|                   |           |                |              |              |              |              |              |                |              |              |                               |
|-------------------|-----------|----------------|--------------|--------------|--------------|--------------|--------------|----------------|--------------|--------------|-------------------------------|
| rs1321338         | 20        | 144,823        | 0,430        | 0,044        |              |              |              |                |              |              | MAFB                          |
| rs2756260         | 20        |                |              |              | 26,680       | 0,058        | 0,025        |                |              |              | PRND (1.83) PRN (1.08)        |
| rs6046214         | 20        |                |              |              | 89,287       | 0,140        | 0,021        |                |              |              | SLC24A3 (0.34)                |
| rs6056374         | 20        |                |              |              | 121,355      | 0,110        | 0,006        |                |              |              | PLCB1 (0.10) PLCB4 (0.35)     |
| rs6121430         | 20        |                |              |              | 162,388      | 0,386        | 0,029        |                |              |              | CDH4 (0.81)                   |
| rs1041786         | 21        |                |              |              |              |              |              | 0,028          | 0,045        | 0,004        | NCAM2                         |
| rs460014          | 21        |                |              |              |              |              |              | 280,793        | 0,357        | 0,003        | inter                         |
| SNP_A-4215996     | 21        |                |              |              |              |              |              | 147,652        | 0,146        | 0,001        | AGPAT3                        |
| rs11701130        | 21        | 0,006          | 0,178        | 0,003        |              |              |              |                |              |              | SLC19A1, COL18A1, C21orf123   |
| rs2824801         | 21        | 0,008          | 0,351        | 0,018        |              |              |              |                |              |              | PRSS7                         |
| rs1709827         | 21        | 0,023          | 0,150        | 0,042        |              |              |              |                |              |              | KCNJ6                         |
| <b>rs7291901</b>  | <b>22</b> |                |              |              | <b>0,091</b> | <b>0,030</b> | <b>0,032</b> | <b>0,078</b>   | <b>0,029</b> | <b>0,022</b> | <b>XPNPEP3 (0.49)</b>         |
| rs2235165         | 22        |                |              |              |              |              |              | 0,021          | 0,133        | 0,030        | FAM19A5                       |
| rs1811828         | 22        |                |              |              |              |              |              | 295,928        | 0,848        | 0,026        | LRP5L                         |
| rs16980525        | 22        | 225,587        | 0,514        | 0,009        |              |              |              |                |              |              | ADRBK2                        |
| rs6007763         | 22        | 16,076         | 0,048        | 0,022        |              |              |              |                |              |              | RP11-191L9.1                  |
| <b>rs16986515</b> | <b>X</b>  | <b>113,443</b> | <b>0,037</b> | <b>0,000</b> |              |              |              | <b>248,589</b> | <b>0,543</b> | <b>0,020</b> | <b>AMELX, ARHGAP6, MSL3L1</b> |
| rs16992781        | X         |                |              |              |              |              |              | 271,567        | 0,801        | 0,035        | inter                         |
| rs12008496        | X         |                |              |              |              |              |              | 291,115        | 0,576        | 0,020        | BCOR                          |
| rs5929497         | X         |                |              |              |              |              |              | 150,700        | 0,242        | 0,013        | inter                         |
| rs5913038         | X         | 80,974         | 0,107        | 0,010        |              |              |              |                |              |              | TBX22, ITM2A,                 |
| rs6632450         | X         | 96,200         | 0,096        | 0,008        |              |              |              |                |              |              | CXorf22                       |
| rs5975196         | X         | 54,120         | 0,040        | 0,004        |              |              |              |                |              |              | FAM45B, RBMX2                 |
| rs3761590         | X         | 0,024          | 0,083        | 0,032        |              |              |              |                |              |              | ITM2A                         |
| rs5936942         | X         | 0,029          | 0,097        | 0,045        |              |              |              |                |              |              | TEX11                         |
| rs5907594         | X         | 0,042          | 0,064        | 0,037        |              |              |              |                |              |              | SOX3                          |
| rs11266224        | X         |                |              |              | 0,011        | 0,272        | 0,033        |                |              |              | MID1IP1 (0.90)                |
| rs16998540        | X         |                |              |              | 46,396       | 0,092        | 0,019        |                |              |              | inter                         |



Supplemental table 5. Non-supervised gene functional clustering considering genes nearby the 280 top-ranked SNPs.

| <b>DAVID CLUSTERING FOR TOP-RANKED SNPs</b>                         |                                                                          |
|---------------------------------------------------------------------|--------------------------------------------------------------------------|
| <b>"transmembrane, adhesion, cadherin" (Enrichment Score: 2.13)</b> |                                                                          |
| NCAM2                                                               | neural cell adhesion molecule 2                                          |
| CDH12                                                               | cadherin 12, type 2 (n-cadherin 2)                                       |
| CDH4                                                                | cadherin 4, type 1, r-cadherin (retinal)                                 |
| PCDH7                                                               | bh-protocadherin (brain-heart)                                           |
| CDH8                                                                | cadherin 8, type 2                                                       |
| CDH11                                                               | cadherin 11, type 2, ob-cadherin (osteoblast)                            |
| FREM2                                                               | fras1 related extracellular matrix protein 2                             |
| RYK                                                                 | ryk receptor-like tyrosine kinase                                        |
| CNNM1                                                               | cyclin m1                                                                |
| PAQR3                                                               | progesterone and adiponectin receptor family member iii                  |
| ROBO2                                                               | roundabout, axon guidance receptor, homolog 2 (drosophila)               |
| ANTXR2                                                              | anthrax toxin receptor 2                                                 |
| GPR63                                                               | g protein-coupled receptor 63                                            |
| NETO1                                                               | neuropilin (nrp) and tolloid (tll)-like 1                                |
| NCR2                                                                | natural cytotoxicity triggering receptor 2                               |
| TNFRSF19                                                            | tumor necrosis factor receptor superfamily, member 19                    |
| GPR156                                                              | g protein-coupled receptor 156                                           |
| MRGPRX3                                                             | mas-related gpr, member x3                                               |
| BTLA                                                                | b and t lymphocyte associated                                            |
| PTPRM                                                               | protein tyrosine phosphatase, receptor type, m                           |
| KLRD1                                                               | killer cell lectin-like receptor subfamily d, member 1                   |
| IL1RL2                                                              | interleukin 1 receptor-like 2                                            |
| IL23R                                                               | interleukin 23 receptor                                                  |
| DCC                                                                 | deleted in colorectal carcinoma                                          |
| SORCS3                                                              | sortilin-related vps10 domain containing receptor 3                      |
| TRAM2                                                               | translocation associated membrane protein 2                              |
| EMCN                                                                | endomucin                                                                |
| SDK1                                                                | sidekick homolog 1 (chicken)                                             |
| SLC14A1                                                             | solute carrier family 14 (urea transporter), member 1 (kidd blood group) |
| SLC19A1                                                             | solute carrier family 19 (folate transporter), member 1                  |
| CD200                                                               | cd200 antigen                                                            |
| ITM2A                                                               | integral membrane protein 2a                                             |
| LRRTM3                                                              | leucine rich repeat transmembrane neuronal 3                             |
| TMEM33                                                              | transmembrane protein 33                                                 |
| SGCZ                                                                | sarcoglycan zeta                                                         |
| MGC33214                                                            | hypothetical protein mgc33214                                            |
| XKR4                                                                | xk, kell blood group complex subunit-related family, member 4            |
| TMEM16C                                                             | transmembrane protein 16c                                                |
| APCDD1                                                              | adenomatous polyposis coli down-regulated 1                              |
| TMEM132E                                                            | transmembrane protein 132e                                               |

| <b>"ribonuclease" (Enrichment Score: 2.02)</b>          |                                                                                                               |
|---------------------------------------------------------|---------------------------------------------------------------------------------------------------------------|
| RNASE1                                                  | ribonuclease, rnase a family, 1 (pancreatic)                                                                  |
| RNASE4                                                  | ribonuclease, rnase a family, 4                                                                               |
| RNASE6                                                  | ribonuclease, rnase a family, k6                                                                              |
| FAM12A                                                  | family with sequence similarity 12, member a                                                                  |
| <b>"ion channel transport" (Enrichment Score: 1.64)</b> |                                                                                                               |
| KCND2                                                   | potassium voltage-gated channel, shal-related subfamily, member 2                                             |
| RYR2                                                    | ryanodine receptor 2 (cardiac)                                                                                |
| RYR3                                                    | ryanodine receptor 3                                                                                          |
| CACNB2                                                  | calcium channel, voltage-dependent, beta 2 subunit                                                            |
| KCNJ6                                                   | potassium inwardly-rectifying channel, subfamily j, member 6                                                  |
| KCTD12                                                  | potassium channel tetramerisation domain containing 12                                                        |
| KCNN1                                                   | potassium intermediate/small conductance calcium-activated channel, subfamily n, member 1                     |
| <b>"Golgi apparatus" (Enrichment Score: 1.12)</b>       |                                                                                                               |
| EXT1                                                    | exostoses (multiple) 1                                                                                        |
| MAN1A1                                                  | mannosidase, alpha, class 1a, member 1                                                                        |
| NDST4                                                   | n-deacetylase/n-sulfotransferase (heparan glucosaminyl) 4                                                     |
| ST6GALNAC5                                              | st6 (alpha-n-acetyl-neuraminyl-2,3-beta-galactosyl-1,3)-n-acetylgalactosaminide alpha-2,6-sialyltransferase 5 |
| NDST3                                                   | n-deacetylase/n-sulfotransferase (heparan glucosaminyl) 3                                                     |
| GALNT1                                                  | udp-n-acetyl-alpha-d-galactosamine:polypeptide n-acetylgalactosaminyltransferase 1 (galnac-t1)                |
| MGAT1                                                   | mannosyl (alpha-1,3-)-glycoprotein beta-1,2-n-acetylglucosaminyltransferase                                   |
| ALG1                                                    | asparagine-linked glycosylation 1 homolog (yeast, beta-1,4-mannosyltransferase)                               |

| <b>DAVID CLUSTERING FOR SNPs ASSOCIATED WITH DIE</b> |                                                               |
|------------------------------------------------------|---------------------------------------------------------------|
| <b>"transmembrane" (Enrichment Score: 1.89)</b>      |                                                               |
| SDK1                                                 | sidekick homolog 1 (chicken)                                  |
| TMEM33                                               | transmembrane protein 33                                      |
| MGC33214                                             | hypothetical protein mgc33214                                 |
| XKR4                                                 | xk, kell blood group complex subunit-related family, member 4 |
| APCDD1                                               | adenomatosis polyposis coli down-regulated 1                  |
| PAQR3                                                | progesterin and adiponectin receptor family member iii        |
| LRRTM3                                               | leucine rich repeat transmembrane neuronal 3                  |
| NCR2                                                 | natural cytotoxicity triggering receptor 2                    |
| IL23R                                                | interleukin 23 receptor                                       |
| TMEM132E                                             | transmembrane protein 132e                                    |
| <b>"transmembrane" (Enrichment Score: 1.23)</b>      |                                                               |
| GPR156                                               | g protein-coupled receptor 156                                |
| MRGPRX3                                              | mas-related gpr, member x3                                    |
| EMCN                                                 | endomucin                                                     |
| GPR63                                                | g protein-coupled receptor 63                                 |
| KLRD1                                                | killer cell lectin-like receptor subfamily d, member 1        |
| PAQR3                                                | progesterin and adiponectin receptor family member iii        |
| NCR2                                                 | natural cytotoxicity triggering receptor 2                    |
| TNFRSF19                                             | tumor necrosis factor receptor superfamily, member 19         |

| <b>DAVID CLUSTERING FOR SNPs ASSOCIATED WITH OMA</b>                                    |                                                                |
|-----------------------------------------------------------------------------------------|----------------------------------------------------------------|
| <b>"transmembrane, cell adhesion, cadherin" (Enrichment Score: 0.89)</b>                |                                                                |
| NETO1                                                                                   | neuropilin (nrp) and tolloid (tll)-like 1                      |
| FREM2                                                                                   | fras1 related extracellular matrix protein 2                   |
| BTLA                                                                                    | b and t lymphocyte associated                                  |
| PTPRM                                                                                   | protein tyrosine phosphatase, receptor type, m                 |
| CDH4                                                                                    | cadherin 4, type 1, r-cadherin (retinal)                       |
| CDH11                                                                                   | cadherin 11, type 2, ob-cadherin (osteoblast)                  |
| SDK1                                                                                    | sidekick homolog 1 (chicken)                                   |
| CDH12                                                                                   | cadherin 12, type 2 (n-cadherin 2)                             |
| SORCS3                                                                                  | sortilin-related vps10 domain containing receptor 3            |
| GPR63                                                                                   | g protein-coupled receptor 63                                  |
| PAQR3                                                                                   | progesterin and adipoq receptor family member iii              |
| CD200                                                                                   | cd200 antigen                                                  |
| <b>"regulation of transcription, DNA binding, zinc finger" (Enrichment Score: 0.83)</b> |                                                                |
| RUNX2                                                                                   | runt-related transcription factor 2                            |
| HSF2                                                                                    | heat shock transcription factor 2                              |
| KLF12                                                                                   | kruppel-like factor 12                                         |
| DLGAP2                                                                                  | discs, large (drosophila) homolog-associated protein 2         |
| CDC5L                                                                                   | cdc5 cell division cycle 5-like (s. pombe)                     |
| ZNF485                                                                                  | zinc finger protein 485                                        |
| ETS1                                                                                    | v-ets erythroblastosis virus e26 oncogene homolog 1 (avian)    |
| MAF                                                                                     | v-maf musculoaponeurotic fibrosarcoma oncogene homolog (avian) |
| PBX3                                                                                    | pre-b-cell leukemia transcription factor 3                     |
| ZNF680                                                                                  | zinc finger protein 680                                        |
| SUPT3H                                                                                  | suppressor of ty 3 homolog (s. cerevisiae)                     |
| SP6                                                                                     | sp6 transcription factor                                       |
| ZNF366                                                                                  | zinc finger protein 366                                        |
| HIVEP1                                                                                  | human immunodeficiency virus type i enhancer binding protein 1 |
| RORA                                                                                    | rar-related orphan receptor a                                  |
| ZNF239                                                                                  | zinc finger protein 239                                        |
| POLR2B                                                                                  | polymerase (rna) ii (dna directed) polypeptide b, 140kda       |
| ZNF659                                                                                  | zinc finger protein 659                                        |

| <b>DAVID CLUSTERING FOR SNPs ASSOCIATED WITH SUP</b>      |                                                                                           |
|-----------------------------------------------------------|-------------------------------------------------------------------------------------------|
| <b>"cadherin, cell adhesion" (Enrichment Score: 1.44)</b> |                                                                                           |
| ANTXR2                                                    | anthrax toxin receptor 2                                                                  |
| PCDH7                                                     | bh-protocadherin (brain-heart)                                                            |
| CDH8                                                      | cadherin 8, type 2                                                                        |
| CDH11                                                     | cadherin 11, type 2, ob-cadherin (osteoblast)                                             |
| SGCZ                                                      | sarcoglycan zeta                                                                          |
| <b>"ion channel transport" (Enrichment Score: 1.08)</b>   |                                                                                           |
| KCNN1                                                     | potassium intermediate/small conductance calcium-activated channel, subfamily n, member 1 |
| KCTD12                                                    | potassium channel tetramerisation domain containing 12                                    |
| CACNB2                                                    | calcium channel, voltage-dependent, beta 2 subunit                                        |

|                                                   |                                                                                                              |
|---------------------------------------------------|--------------------------------------------------------------------------------------------------------------|
| KCNJ6                                             | potassium inwardly-rectifying channel, subfamily j, member 6                                                 |
| <b>"golgi apparatus" (Enrichment Score: 0.98)</b> |                                                                                                              |
| ST6GALNAC5                                        | st6 (alpha-n-acetyl-neuraminy-2,3-beta-galactosyl-1,3)-n-acetylgalactosaminide alpha-2,6-sialyltransferase 5 |
| ALG1                                              | asparagine-linked glycosylation 1 homolog (yeast, beta-1,4-mannosyltransferase)                              |
| NDST4                                             | n-deacetylase/n-sulfotransferase (heparan glucosaminyl) 4                                                    |
| NDST3                                             | n-deacetylase/n-sulfotransferase (heparan glucosaminyl) 3                                                    |
| MGAT1                                             | mannosyl (alpha-1,3-)-glycoprotein beta-1,2-n-acetylglucosaminyltransferase                                  |

|                                                                   |                                                        |
|-------------------------------------------------------------------|--------------------------------------------------------|
| <b>DAVID CLUSTERING FOR SNPs ASSOCIATED WITH SUP, OMA and DIE</b> |                                                        |
| <b>"Transmembrane" (Enrichment Score: 0.73)</b>                   |                                                        |
| TMEM16C                                                           | transmembrane protein 16c                              |
| TMEM33                                                            | transmembrane protein 33                               |
| ITM2A                                                             | integral membrane protein 2a                           |
| PAQR3                                                             | progesterin and adiponectin receptor family member iii |
| LRRTM3                                                            | leucine rich repeat transmembrane neuronal 3           |

Supplemental table 6. Distribution of genotype frequencies in cases and controls. NA: not applicable, OR: odds ratio, 95%CI: 95% confidence interval, CTR: controls, SUP: peritoneal superficial endometriosis, OMA: endometrioma, DIE: deep infiltrating endometriosis. P-values are for the Pearson's chi-square test.

|            | CTR |    |    | SUP |    |    | p-value | OMA |    |    | p-value | DIE |    |    | p-value |
|------------|-----|----|----|-----|----|----|---------|-----|----|----|---------|-----|----|----|---------|
| rs776108   | AA  | AG | GG | AA  | AG | GG |         | AA  | AG | GG |         | AA  | AG | GG |         |
|            | 52  | 34 | 4  | 15  | 6  | 1  | 0.648   | 30  | 13 | 1  | 0.480   | 50  | 32 | 2  | 0.756   |
| rs3746192  | AA  | AG | GG | AA  | AG | GG |         | AA  | AG | GG |         | AA  | AG | GG |         |
|            | 4   | 28 | 59 | 0   | 15 | 26 | 0.349   | 3   | 17 | 30 | 0.822   | 7   | 35 | 54 | 0.431   |
| rs988147   | CC  | CT | TT | CC  | CT | TT |         | CC  | CT | TT |         | CC  | CT | TT |         |
|            | 29  | 47 | 19 | 13  | 18 | 8  | 0.934   | 33  | 16 | 5  | 0.061   | 29  | 42 | 14 | 0.785   |
| rs227849   | AA  | AG | GG | AA  | AG | GG |         | AA  | AG | GG |         | AA  | AG | GG |         |
|            | 39  | 39 | 17 | 9   | 22 | 11 | 0.081   | 7   | 27 | 16 | 0.003   | 40  | 39 | 17 | 0.996   |
| rs10733833 | CC  | CG | GG | CC  | CG | GG |         | CC  | CG | GG |         | CC  | CG | GG |         |
|            | 13  | 41 | 38 | 8   | 21 | 13 | 0.486   | 6   | 26 | 18 | 0.697   | 17  | 43 | 35 | 0.720   |
| rs322609   | CC  | CT | TT | CC  | CT | TT |         | CC  | CT | TT |         | CC  | CT | TT |         |
|            | 42  | 38 | 14 | 14  | 22 | 6  | 0.395   | 15  | 27 | 7  | 0.209   | 33  | 47 | 16 | 0.342   |
| rs1884779  | AA  | AG | GG | AA  | AG | GG |         | AA  | AG | GG |         | AA  | AG | GG |         |
|            | 28  | 47 | 19 | 18  | 16 | 5  | 0.179   | 17  | 23 | 8  | 0.757   | 34  | 42 | 20 | 0.648   |
| rs4703908  | CC  | CG | GG | CC  | CG | GG |         | CC  | CG | GG |         | CC  | CG | GG |         |
|            | 64  | 30 | 1  | 22  | 18 | 2  | 0.140   | 24  | 21 | 5  | 0.009   | 56  | 39 | 1  | 0.427   |
| rs6946871  | CC  | CT | TT | CC  | CT | TT |         | CC  | CT | TT |         | CC  | CT | TT |         |
|            | 3   | 26 | 65 | 2   | 9  | 31 | 0.697   | 3   | 18 | 29 | 0.371   | 4   | 30 | 62 | 0.787   |
| rs11865033 | CC  | CG | GG | CC  | CG | GG |         | CC  | CG | GG |         | CC  | CG | GG |         |
|            | 0   | 18 | 75 | 0   | 6  | 36 | 0.476   | 0   | 12 | 38 | 0.515   | 0   | 11 | 83 | 0.148   |
| rs247004   | AA  | AG | GG | AA  | AG | GG |         | AA  | AG | GG |         | AA  | AG | GG |         |
|            | 1   | 20 | 50 | 0   | 8  | 28 | 0.604   | 0   | 12 | 34 | 0.691   | 1   | 23 | 58 | 0.994   |
| rs11647011 | AA  | AG | GG | AA  | AG | GG |         | AA  | AG | GG |         | AA  | AG | GG |         |
|            | 66  | 13 | 2  | 34  | 7  | 0  | 0.595   | 36  | 8  | 1  | 0.967   | 74  | 11 | 1  | 0.667   |
| rs7477459  | CC  | CG | GG | CC  | CG | GG |         | CC  | CG | GG |         | CC  | CG | GG |         |
|            | 64  | 21 | 1  | 23  | 9  | 1  | 0.724   | 37  | 8  | 0  | 0.510   | 58  | 11 | 1  | 0.407   |
| rs5913038  | AA  | AG | GG | AA  | AG | GG |         | AA  | AG | GG |         | AA  | AG | GG |         |
|            | 67  | 27 | 1  | 29  | 10 | 0  | 0.762   | 32  | 9  | 1  | 0.600   | 64  | 30 | 2  | 0.758   |
| rs17056959 | CC  | CT | TT | CC  | CT | TT |         | CC  | CT | TT |         | CC  | CT | TT |         |
|            | 0   | 6  | 77 | 0   | 4  | 37 | 0.627   | 0   | 5  | 40 | 0.454   | 0   | 4  | 69 | 0.656   |
| rs16986515 | CC  | CT | TT | CC  | CT | TT |         | CC  | CT | TT |         | CC  | CT | TT |         |
|            | 94  | 0  | 0  | 39  | 0  | 0  | NA      | 44  | 0  | 0  | NA      | 96  | 0  | 0  | NA      |

Supplemental table 7. Distribution of genotype frequencies in cases and controls for the DIE subtypes. NA: not applicable, OR: odds ratio, 95%CI: 95% confidence interval, CTR: controls, USL: uterosacral ligaments, VA: vagina, BLA: bladder, DIG: intestine. P-values are for the Pearson's chi-square test.

|            | CTR |    |    | USL |    |    | p-value | VA |    |    | p-value | BLA |    |    | p-value | DIG |    |    | p-value |
|------------|-----|----|----|-----|----|----|---------|----|----|----|---------|-----|----|----|---------|-----|----|----|---------|
|            | AA  | AG | GG | AA  | AG | GG |         | AA | AG | GG |         | AA  | AG | GG |         | AA  | AG | GG |         |
| rs776108   | 52  | 34 | 4  | 9   | 10 | 2  | 0.383   | 15 | 5  | 0  | 0.296   | 8   | 4  | 0  | 0.694   | 18  | 13 | 0  | 0.477   |
| rs3746192  | 4   | 28 | 59 | 1   | 9  | 14 | 0.820   | 2  | 5  | 16 | 0.542   | 2   | 5  | 5  | 0.132   | 2   | 16 | 19 | 0.312   |
| rs988147   | 29  | 47 | 19 | 8   | 12 | 2  | 0.480   | 8  | 9  | 3  | 0.689   | 0   | 4  | 3  | 0.150   | 13  | 17 | 6  | 0.805   |
| rs227849   | 39  | 39 | 17 | 9   | 10 | 5  | 0.927   | 13 | 6  | 4  | 0.351   | 4   | 6  | 2  | 0.831   | 14  | 17 | 6  | 0.877   |
| rs10733833 | 13  | 41 | 38 | 3   | 12 | 8  | 0.802   | 4  | 11 | 8  | 0.831   | 3   | 4  | 5  | 0.570   | 7   | 16 | 14 | 0.787   |
| rs322609   | 42  | 38 | 14 | 5   | 16 | 3  | 0.058   | 9  | 13 | 1  | 0.243   | 4   | 4  | 4  | 0.275   | 15  | 14 | 8  | 0.649   |
| rs1884779  | 28  | 47 | 19 | 6   | 11 | 7  | 0.633   | 9  | 9  | 5  | 0.610   | 4   | 6  | 2  | 0.946   | 15  | 16 | 6  | 0.494   |
| rs4703908  | 64  | 30 | 1  | 18  | 6  | 9  | 0.709   | 12 | 10 | 1  | 0.269   | 11  | 1  | 0  | 0.222   | 15  | 22 | 0  | 0.012   |
| rs6946871  | 3   | 26 | 65 | 2   | 6  | 16 | 0.533   | 1  | 10 | 12 | 0.304   | 0   | 5  | 7  | 0.533   | 1   | 9  | 27 | 0.911   |
| rs11865033 | 0   | 18 | 75 | 0   | 1  | 23 | 0.072   | 0  | 2  | 21 | 0.226   | 0   | 1  | 10 | 0.405   | 0   | 7  | 29 | 0.991   |
| rs247004   | 1   | 20 | 50 | 0   | 5  | 17 | 0.739   | 0  | 10 | 11 | 0.226   | 0   | 2  | 10 | 0.632   | 1   | 6  | 20 | 0.670   |
| rs11647011 | 66  | 13 | 2  | 22  | 0  | 0  | 0.092   | 16 | 4  | 1  | 0.800   | 8   | 1  | 0  | 0.817   | 28  | 6  | 0  | 0.644   |
| rs7477459  | 64  | 21 | 1  | 15  | 3  | 0  | 0.686   | 13 | 4  | 1  | 0.465   | 5   | 0  | 0  | 0.430   | 25  | 4  | 0  | 0.396   |
| rs5913038  | 67  | 27 | 1  | 18  | 5  | 1  | 0.456   | 15 | 8  | 0  | 0.752   | 7   | 4  | 1  | 0.188   | 24  | 13 | 0  | 0.635   |
| rs17056959 | 0   | 6  | 77 | 0   | 1  | 15 | 0.889   | 0  | 1  | 16 | 0.843   | 0   | 2  | 6  | 0.090   | 0   | 0  | 32 | 0.118   |
| rs16986515 | 94  | 0  | 0  | 24  | 0  | 0  | NA      | 23 | 0  | 0  | NA      | 12  | 0  | 0  | NA      | 37  | 0  | 0  | NA      |

Supplemental table 8. Distribution of genotype and allele frequencies in cases and controls. Testing deviation from the Hardy Weinberg proportions (HWP) was performed using Pearson's chi-squared test (with a 5% significance level for 1 degree of freedom at 3.84). OR: odds ratio, 95%CI: 95% confidence interval. P-values are for the Pearson's chi-squared test.

|            | Genotypes |    |     | Alleles |       | $\chi^2$ test for HWP deviation | OR   | 95%CI      | P-value |
|------------|-----------|----|-----|---------|-------|---------------------------------|------|------------|---------|
|            | CC        | CT | TT  | C (%)   | T (%) |                                 |      |            |         |
| rs16913217 |           |    |     |         |       |                                 |      |            |         |
| OMA        | 0         | 1  | 70  | 0.7     | 99.3  | 0,998                           |      |            |         |
| Controls   | 1         | 11 | 180 | 3.4     | 96.4  | 0,227                           | 4.94 | 0.64-38.12 | 0.270   |
| rs2479037  |           |    |     |         |       |                                 |      |            |         |
| OMA        | 0         | 3  | 63  | 2.3     | 97.7  | 0,982                           |      |            |         |
| Controls   | 5         | 25 | 160 | 9.2     | 90.8  | 0,013                           | 4.36 | 1.32-14.43 | 0.005   |
| rs966674   |           |    |     |         |       |                                 |      |            |         |
| OMA        | 50        | 17 | 3   | 83.6    | 16.4  | 0,627                           |      |            |         |
| Controls   | 169       | 22 | 1   | 93.7    | 6.3   | 0,954                           | 2.95 | 1.60-5.42  | 0.002   |
| rs7333155  |           |    |     |         |       |                                 |      |            |         |
| OMA        | 63        | 7  | 0   | 95.0    | 5.0   | 0,908                           |      |            |         |
| Controls   | 156       | 17 | 8   | 90.9    | 9.1   | 0,000                           | 0.52 | 0.23-1.22  | 0.202   |
| rs11865033 |           |    |     |         |       |                                 |      |            |         |
| OMA        | 0         | 15 | 54  | 10.9    | 89.1  | 0,599                           |      |            |         |
| Controls   | 0         | 28 | 142 | 8.2     | 91.8  | 0,504                           | 0.74 | 0.38-1.43  | 0.337   |
